# Supplementary material for: Protein Complex Evolution Does Not Involve Extensive Network Rewiring
Source: PLOS journal article supplement (doi:10.1371/journal.pcbi.1000132), 2008-07-24
Supplement: S1 (10.1371/journal.pcbi.1000132.s001) [file journal.pcbi.1000132.s001]

301 Moved Permanently

# Moved Permanently

The document has moved here.

---

Apache Server at www.ploscompbiol.org Port 80
